# Supplementary material
Source: MDPI journal article supplement (https://www.mdpi.com/2072-4292/3/7/1308)
Supplement: s1 [file s1]

Correction

## Correction on “Towards Detecting Swath Events in TerraSAR-X Time Series to Establish NATURA 2000 Grassland Habitat Swath Management as Monitoring Parameter”

Christian Schuster <sup>1,\*</sup>, Iftikhar Ali <sup>1</sup>, Peter Lohmann <sup>2</sup>, Annett Frick <sup>3</sup>, Michael Förster <sup>1</sup>  
and Birgit Kleinschmit <sup>1</sup>

<sup>1</sup> Department of Geoinformation for Environmental Planning, Technische Universität Berlin, Straße des 17. Juni 145, D-10623 Berlin, Germany; E-Mails: iffi.math@gmail.com (I.A.); michael.foerster@tu-berlin.de (M.F.); birgit.kleinschmit@tu-berlin.de (B.K.)

<sup>2</sup> Institute of Photogrammetry and GeoInformation, Leibniz Universität Hannover, Nienburger Str. 1, D-30167 Hannover, Germany; E-Mail: lohmann@ipi.uni-hannover.de

<sup>3</sup> Luftbild Umwelt Planung GmbH Potsdam, Große Weinmeisterstraße 3a, D-14469 Potsdam, Germany; E-Mail: annett.frick@lup-umwelt.de

\* Author to whom correspondence should be addressed; E-Mail: christian.schuster@tu-berlin.de; Tel.: +49-30-314-79096.

Received: 28 June 2012 / Accepted: 28 June 2012 / Published: 15 August 2012

We found a mistake in the swath detection rule in Section 2.4 [1]. Specifically, the percent deviation calculation in the definition of the signal changes  $D_1$  and  $D_2$  and axiom  $A_2$  are altered. The correct version shall be:

Consequently, the proposed rule for the detection of swath events consists of two axioms ( $A_1$  and  $A_2$ ) that need to be satisfied. For the signal backscatter ( $\sigma^0$ ) at a specific acquisition order number ( $k$ ) of the acquired scene in the time series ( $N$ ), the positive or negative signal changes in percent deviation for the first ( $D_1$ ) and second ( $D_2$ ) acquisition after a potential swath event are considered as:

$$D_1 = (\sigma^0(k) - \sigma^0(k-1)) / (-\sigma^0(k)) \times 100$$

$$D_2 = (\sigma^0(k+1) - \sigma^0(k)) / (-\sigma^0(k)) \times 100$$

The second axiom focuses on the absolute magnitude of signal change:

$$|D_1| \succ \frac{\sum_{i=1}^N |\sigma^0(i-1) - \sigma^0(i)|}{N} / (\sigma^0(i)) \times 100, \text{ where } \forall i, D_1 \succ \approx 10\%$$

AND

$$|D_2| \succ \frac{\sum_{i=1}^N |\sigma^0(i-1) - \sigma^0(i)|}{N} / (\sigma^0(i)) \times 100, \text{ where } \forall i, D_2 \succ \approx 5\%$$
(A<sub>2</sub>)

If (A<sub>1</sub>) and (A<sub>2</sub>) are satisfied then:

$$\sigma^0(k) \Rightarrow \text{swath}$$

## References

1. Schuster, C.; Ali, I.; Lohmann, P.; Frick, A.; Förster, M.; Kleinschmit, B. Towards detecting swath events in TerraSAR-X time series to establish NATURA 2000 grassland habitat swath management as monitoring parameter. *Remote Sens.* **2011**, *3*, 1308–1322.

© 2012 by the authors; licensee MDPI, Basel, Switzerland. This article is an open access article distributed under the terms and conditions of the Creative Commons Attribution license (<http://creativecommons.org/licenses/by/3.0/>).
